# Supplementary material for: Interaction between host genes and Mycobacterium tuberculosis lineage can affect tuberculosis severity: Evidence for coevolution?
Source: PLoS Genet. 2020 Apr 30;16(4):e1008728. doi: 10.1371/journal.pgen.1008728 (PMC7217476; doi:10.1371/journal.pgen.1008728)
Supplement: S4 Table — (XLSX) [file pgen.1008728.s005.xlsx]

## Sheet: Interaction Supplemental Table
SNP Name	Gene Name	Set 1 - β	95% CI - Lower Bound	95% CI - Upper Bound	P-Value	Set 2 - β	95% CI - Lower Bound	95% CI - Upper Bound	P-Value	Combined - β	95% CI - Lower Bound	95% CI - Upper Bound	P-Value	Position	Chr	Reference Allele	Function	Cytological Band
rs17235409	SLC11A1	2.35732	0.212413	4.50222	0.0334552	2.70868	0.906116	4.51125	0.00390012	2.62661	1.25321	4	0.000225314	219259732	2	A	exonic	2q35
rs5743621	TLR1	6.16746	3.01375	9.32117	0.000219151	1.52905	-3.34312	6.40121	0.539685	4.11149	1.48971	6.73327	0.00237795	38798255	4	G	exonic	NA
rs7938943	IL18	2.07395	-1.16603	5.31393	0.212376	3.55053	0.852718	6.24834	0.0111431	2.91964	0.851865	4.98742	0.00611546	112016661	11	G	intronic	NA
rs17129772	IL12RB2	1.65333	-0.38112	3.68779	0.114149	2.11204	0.138254	4.08582	0.0381401	1.89436	0.479367	3.30935	0.00927727	67786088	1	T	exonic	1p31.3
rs11305	STAT1	1.53535	-0.313828	3.38454	0.106601	1.73672	-0.119447	3.59288	0.0692365	1.64107	0.331936	2.95021	0.0147581	191834030	2	A	UTR3	2q32.2
rs2279014	SLC11A1	0.518706	-1.3043	2.34171	0.578257	2.38278	0.715195	4.05037	0.0059773	1.47836	0.244144	2.71257	0.0197566	219261176	2	C	UTR3	2q35
rs736782	NOD1	0.234894	-1.64392	2.11371	0.806892	1.9902	0.357082	3.62331	0.0185285	1.3762	0.183415	2.56899	0.0246784	30504273	7	C	intronic	7p14.3
rs7255265	TICAM1	-3.18362	-8.12782	1.76058	0.209722	-5.6999	-10.676	-0.723818	0.026657	-3.95612	-7.43051	-0.48172	0.0266128	4818378	19	C	exonic	NA
rs1518111	IL10	-1.42429	-3.2632	0.414615	0.131971	-1.25849	-2.98007	0.463086	0.15461	-1.41618	-2.66456	-0.167799	0.0271708	206944645	1	C	intronic	1q32.1
rs1554286	IL10	-1.40855	-3.26399	0.446878	0.139765	-1.25849	-2.98007	0.463086	0.15461	-1.40939	-2.66272	-0.156057	0.0285301	206944233	1	A	intronic	1q32.1
rs2546892	IL12B	2.80309	-0.249638	5.85582	0.0746969	3.87162	-0.71259	8.45583	0.100561	2.74445	0.270718	5.21819	0.0306923	158755475	5	G	intronic	NA
rs3024490	IL10	-1.31686	-3.15358	0.51985	0.162869	-1.25849	-2.98007	0.463086	0.15461	-1.36194	-2.60824	-0.115629	0.033271	206945311	1	T	intronic	1q32.1
rs11574790	IL12B	1.81023	-0.0650399	3.6855	0.0611914	1.02955	-0.752047	2.81114	0.259699	1.39876	0.11019	2.68732	0.0344433	158743846	5	T	intronic	5q33.3
rs5744034	TOLLIP	1.73611	-2.13751	5.60973	0.381706	6.56473	1.79973	11.3297	0.00796507	3.17216	0.222253	6.12206	0.0361614	1296237	11	A	UTR3	NA
rs8177360	TIRAP	NA	NA	NA	NA	2.79079	-0.469799	6.05138	0.0961187	3.12288	0.213915	6.03185	0.0364722	126156867	11	G	intronic	NA
rs2856838	IL1A	-0.861125	-2.67149	0.949242	0.35332	-1.36594	-2.94079	0.208907	0.0918105	-1.26275	-2.4527	-0.0727941	0.0386622	113539972	2	T	intronic	2q13
rs3775073	TLR6	-1.63193	-3.55635	0.292486	0.0994461	-1.04063	-2.90809	0.826818	0.277006	-1.38536	-2.70204	-0.068673	0.0403247	38829832	4	T	exonic	4p14
rs17770244	NOD1	-3.31554	-6.31969	-0.311397	0.0327753	-0.97552	-4.17676	2.22572	0.551488	-2.27839	-4.45541	-0.101375	0.0413888	30515812	7	A	intronic	NA
rs2227284	IL4	-1.85185	-4.57324	0.869548	0.18515	-1.41211	-4.07838	1.25417	0.301404	-1.93484	-3.78534	-0.0843527	0.0415782	132012725	5	A	intronic	5q31.1
rs13062	SLC11A1	0.291882	-1.49554	2.0793	0.749545	2.04478	0.39854	3.69102	0.0164363	1.21596	0.00429885	2.42762	0.0504013	219260651	2	G	UTR3	2q35
rs10493423	IL12RB2	1.03865	-0.696253	2.77356	0.24326	1.38822	-0.253941	3.03039	0.10024	1.18849	0.00421861	2.37276	0.0504034	67837158	1	G	intronic	1p31.3
rs3212220	IL12B	-2.16953	-4.03573	-0.303318	0.0248197	-0.329341	-2.00907	1.35039	0.701465	-1.23386	-2.47085	0.00312416	0.0518379	158754195	5	A	intronic	5q33.3
rs6963954	NOD1	-0.932121	-2.8569	0.992662	0.34467	-1.64447	-3.38558	0.0966442	0.0666835	-1.27959	-2.5693	0.0101299	0.0530523	30514441	7	T	intronic	7p14.3
rs17887176	IL12RB1	-0.437689	-3.17308	2.2977	0.754415	-3.13661	-5.88683	-0.386381	0.0273078	-1.90462	-3.83425	0.0250156	0.0542724	18193060	19	G	exonic	19p13.11
rs2227538	CXCL8	0.119421	-2.89502	3.13386	0.938312	1.35559	-0.269142	2.98032	0.104693	1.32056	-0.030212	2.67134	0.0567921	74606375	4	A	UTR5	4q13.3
rs2252596	IL12RB2	0.964309	-0.767026	2.69564	0.277431	1.38822	-0.253941	3.03039	0.10024	1.15584	-0.0275108	2.33918	0.0568166	67833501	1	A	intronic	1p31.3
rs2069719	IFNG	2.20543	-2.91658	7.32743	0.400589	2.88085	-1.5175	7.27921	0.201781	3.05577	-0.164135	6.27567	0.0641608	68549786	12	T	intronic	NA
rs6699474	IL12RB2	-0.978965	-2.91258	0.954654	0.32328	-1.29712	-3.11522	0.520985	0.164675	-1.23506	-2.54893	0.0788211	0.0667126	67859615	1	T	intronic	1p31.3
rs3024491	IL10	-0.104496	-1.85601	1.64702	0.907131	2.00587	0.385953	3.62579	0.0167637	1.08976	-0.0986422	2.27816	0.0736094	206945046	1	G	intronic	1q32.1
rs2222202	IL10	-0.141525	-1.90503	1.62198	0.875313	2.00587	0.385953	3.62579	0.0167637	1.08198	-0.110446	2.27441	0.0766667	206945381	1	A	intronic	1q32.1
rs3771300	STAT1	-1.99985	-3.74097	-0.258735	0.0264124	-0.201217	-1.88276	1.48033	0.814981	-1.06789	-2.27225	0.136466	0.0835767	191835596	2	G	intronic	2q32.2
rs2227532	CXCL8	2.91123	0.579743	5.24273	0.0160333	-0.0676256	-2.47313	2.33788	0.956153	1.48577	-0.196459	3.168	0.0847924	74605532	4	G	upstream	4q13.3
rs2381289	TLR6	-0.683071	-2.44476	1.07862	0.448964	-1.52462	-3.13493	0.0856883	0.066034	-1.0276	-2.20004	0.144836	0.0871836	38826871	4	T	UTR3	4p14
rs372889	IL12RB1	-0.323566	-2.32094	1.67381	0.751475	-2.24563	-4.25323	-0.238034	0.0303479	-1.23476	-2.65142	0.18189	0.0889328	18173603	19	G	intronic	19p13.11
rs250686	SLC6A3	-1.18578	-3.03053	0.658967	0.210538	-0.881848	-2.52042	0.756723	0.293693	-1.05216	-2.26852	0.164206	0.0913819	1425159	5	G	intronic	5p15.33
rs6959470	NOD1	1.12583	-0.796465	3.04813	0.253716	1.13749	-0.62051	2.89549	0.207269	1.09826	-0.19289	2.3894	0.0968871	30469890	7	G	intronic	7p14.3
rs3212227	IL12B	-1.575	-3.33694	0.186929	0.0826288	-0.329341	-2.00907	1.35039	0.701465	-1.01028	-2.21417	0.19362	0.101394	158742950	5	A	UTR3	5q33.3
rs13029532	STAT1	1.68781	-0.27069	3.64631	0.0941119	0.652807	-1.02117	2.32679	0.446212	1.04601	-0.201785	2.29381	0.101752	191875901	2	T	intronic	2q32.2
rs6869645	SLC6A3	-2.55102	-4.52186	-0.580192	0.0126227	0.138659	-1.64676	1.92408	0.87928	-1.12024	-2.4588	0.218323	0.102318	1404548	5	T	intronic	5p15.33
rs6664757	IL12RB2	1.03393	-0.750789	2.81865	0.258786	0.952138	-0.779846	2.68412	0.283498	1.04232	-0.204817	2.28946	0.102796	67821447	1	T	intronic	1p31.3
rs7575823	STAT1	1.29458	-0.407849	2.99701	0.139049	0.80822	-0.825054	2.44149	0.334115	0.978767	-0.195676	2.15321	0.103756	191835918	2	T	intronic	2q32.2
rs8177375	TIRAP	1.42504	-0.413652	3.26373	0.13167	0.916771	-0.869936	2.70348	0.316659	1.04737	-0.221005	2.31575	0.106935	126163064	11	A	UTR3	11q24.2
rs16833172	STAT1	-1.58163	-3.5654	0.402153	0.121084	-0.782773	-2.74077	1.17522	0.434887	-1.14633	-2.53464	0.241977	0.106964	191876069	2	T	intronic	2q32.2
rs3213094	IL12B	-1.52319	-3.28189	0.235502	0.0925283	-0.329341	-2.00907	1.35039	0.701465	-0.991559	-2.19509	0.211976	0.107745	158750769	5	G	intronic	5q33.3
rs2070874	IL4	-0.887647	-2.90325	1.12795	0.389979	-2.12552	-4.19603	-0.0550009	0.0465302	-1.18453	-2.62553	0.256471	0.108529	132009710	5	C	UTR5	5q31.1
rs403636	SLC6A3	-0.63299	-2.36763	1.10165	0.476028	-1.07722	-2.68715	0.532699	0.192291	-0.96504	-2.14125	0.211167	0.109193	1438354	5	A	intronic	5p15.33
rs2243246	IL4	0.61997	-1.34606	2.586	0.537869	1.4067	-0.35352	3.16691	0.119989	1.03655	-0.235054	2.30814	0.111508	132008408	5	G	intergenic	5q31.1
rs7753590	IFNGR1	0.496045	-1.44181	2.4339	0.616909	1.31008	-0.446962	3.06712	0.146607	1.02833	-0.240223	2.29687	0.113489	137540645	6	G	upstream	6q23.3
rs2770146	NOD1	-1.80759	-3.55667	-0.0585137	0.0452979	0.183601	-1.89251	2.25971	0.862692	-1.06481	-2.37895	0.249323	0.11364	120473338	9	T	intronic	9q33.1
rs6815827	TLR6	-0.332248	-2.55298	1.88848	0.769923	1.92922	0.122961	3.73548	0.03849	1.11132	-0.267194	2.48984	0.115489	38825141	4	G	downstream	4p14
rs5743270	NOD2	-4.62225	-9.34665	0.102159	0.0578009	-1.35333	-4.94738	2.24072	0.461985	-2.28219	-5.12183	0.557458	0.116584	50742062	16	G	intronic	NA
rs736781	NOD1	0.76896	-0.975468	2.51339	0.389528	1.05622	-0.599633	2.71207	0.213733	0.955267	-0.238222	2.14876	0.118086	30504160	7	A	intronic	7p14.3
rs5743818	TLR6	0.248523	-3.84442	4.34147	0.90549	-4.29733	-7.64855	-0.946103	0.0133318	-2.06364	-4.64364	0.51637	0.118333	38829163	4	A	exonic	NA
rs3212219	IL12B	-1.45453	-3.20332	0.294273	0.106002	-0.329341	-2.00907	1.35039	0.701465	-0.957696	-2.15814	0.242749	0.119285	158754461	5	T	intronic	5q33.3
rs2834214	IFNGR2	-0.2552	-2.06676	1.55636	0.782994	-1.59013	-3.29478	0.114524	0.0700709	-0.998629	-2.25141	0.254151	0.119586	34793706	21	G	intronic	21q22.11
rs2243288	IL4	-1.13965	-2.90574	0.626436	0.208723	-0.622788	-2.25177	1.0062	0.45517	-0.925165	-2.11483	0.264497	0.128842	132017944	5	A	intronic	5q31.1
rs11938228	TLR2	-1.50385	-3.64065	0.632953	0.170615	-1.23192	-3.05407	0.590221	0.187734	-1.06225	-2.43234	0.307847	0.129989	154621946	4	A	intronic	4q31.3
rs12270240	IL18	-0.229677	-2.42494	1.96559	0.837917	-2.59256	-5.45093	0.265822	0.0780694	-1.31781	-3.02032	0.384694	0.130627	112030183	11	T	intronic	11q23.1
rs2195940	IL12B	1.29032	-0.611531	3.19217	0.186448	0.623937	-1.15095	2.39882	0.492192	0.992805	-0.302759	2.28837	0.134495	158744352	5	A	intronic	5q33.3
rs16833141	STAT1	-1.71813	-4.03539	0.599122	0.149082	-0.76741	-3.13887	1.60405	0.52716	-1.2506	-2.88783	0.386635	0.135739	191842440	2	T	intronic	2q32.2
rs13005843	STAT1	1.62782	-0.955812	4.21146	0.219547	-3.68218	-5.93907	-1.42529	0.00178528	-1.30529	-3.03455	0.423978	0.140394	191854726	2	G	intronic	2q32.2
rs11904548	STAT1	-2.64479	-4.70947	-0.580115	0.0135889	0.167863	-1.69617	2.03189	0.860205	-1.0222	-2.41238	0.367991	0.150925	191858990	2	T	intronic	2q32.2
rs1433048	IL12B	-3.45646	-8.58365	1.67074	0.189214	-1.67943	-5.10787	1.74902	0.338999	-2.04786	-4.84164	0.745925	0.152177	158755845	5	A	intronic	NA
rs1874396	IL12RB2	1.54723	-0.288346	3.3828	0.101444	0.246322	-1.50333	1.99597	0.783088	0.915515	-0.351354	2.18238	0.158019	67862466	1	G	UTR3	1p31.3
rs2066843	NOD2	-1.4087	-3.67675	0.859346	0.226166	-1.23969	-3.89947	1.42008	0.362857	-1.21713	-2.92752	0.493255	0.164452	50745199	16	C	exonic	16q12.1
rs1143633	IL1B	1.15552	-0.633462	2.9445	0.208269	0.914011	-0.772396	2.60042	0.290308	0.854751	-0.350218	2.05972	0.165783	113590467	2	G	intronic	2q13
rs2952802	NOD1	-0.556971	-2.74166	1.62771	0.61835	-1.50834	-3.46057	0.443902	0.132662	-1.01649	-2.46973	0.436737	0.171752	30511551	7	G	intronic	7p14.3
rs2243274	IL4	-1.01096	-2.76873	0.746811	0.262151	-0.595398	-2.21801	1.02721	0.473464	-0.828003	-2.01227	0.356266	0.171919	132014832	5	C	intronic	5q31.1
rs2284358	NOD1	-2.16974	-4.20655	-0.132939	0.0392473	0.0671498	-1.94922	2.08352	0.948069	-0.986639	-2.40285	0.429574	0.173465	30489007	7	T	intronic	7p14.3
rs1914408	STAT1	-0.393294	-2.16016	1.37357	0.663509	-1.13782	-2.72915	0.453513	0.163758	-0.822543	-2.00333	0.358247	0.173491	191839976	2	G	intronic	2q32.2
rs1143630	IL1B	-1.77333	-3.48251	-0.0641505	0.0444937	-0.168574	-1.83664	1.49949	0.843332	-0.822713	-2.00506	0.359634	0.173973	113591655	2	G	intronic	2q13
rs2243250	IL4	-0.360259	-2.13542	1.4149	0.691606	-1.27072	-2.89379	0.352358	0.12763	-0.829354	-2.02404	0.365336	0.174985	132009154	5	C	upstream	5q31.1
rs2970501	NOD1	-1.52042	-5.26115	2.2203	0.427422	-2.0409	-5.69148	1.60967	0.275451	-1.79665	-4.39682	0.803516	0.176978	30495993	7	C	intronic	NA
rs2421047	IL12B	-1.68654	-3.46015	0.0870825	0.0652028	0.0460782	-1.61729	1.70945	0.956793	-0.833537	-2.04119	0.374119	0.177479	158746307	5	A	intronic	5q33.3
rs1304037	IL1A	0.775338	-1.11083	2.66151	0.422211	0.912434	-0.693981	2.51885	0.267895	0.829216	-0.372793	2.03123	0.177676	113532236	2	A	UTR3	2q13
rs2076756	NOD2	-1.53454	-3.8218	0.752726	0.19133	NA	NA	NA	NA	-1.44412	-3.55362	0.665379	0.181004	50756774	16	G	intronic	16q12.1
rs3793966	TOLLIP	0.243245	-1.99337	2.47986	0.831606	1.41387	-0.315426	3.14316	0.111766	0.916968	-0.42696	2.2609	0.182452	1302948	11	G	intronic	11p15.5
rs9808685	IFNGR2	0.0516045	-1.90369	2.0069	0.958842	1.61306	-0.120741	3.34686	0.0708015	0.877064	-0.414555	2.16868	0.18455	34785672	21	T	intronic	21q22.11
rs2290708	SLC11A1	0.261411	-1.61848	2.1413	0.785734	0.961196	-0.716424	2.63882	0.263762	0.840704	-0.399012	2.08042	0.185136	219252377	2	C	intronic	2q35
rs1861494	IFNG	1.34156	-0.763631	3.44675	0.214404	0.838088	-1.50913	3.1853	0.485434	1.04925	-0.504205	2.60271	0.186886	68551409	12	G	intronic	12q15
rs2066804	STAT1	-0.24171	-2.02369	1.54027	0.790861	-1.13782	-2.72915	0.453513	0.163758	-0.796246	-1.97795	0.385452	0.187933	191841759	2	G	intronic	2q32.2
rs2066798	STAT1	-1.89835	-4.09882	0.302129	0.0938244	-0.236467	-2.49295	2.02002	0.837622	-1.04471	-2.59911	0.509697	0.18907	191874753	2	T	intronic	2q32.2
rs3804099	TLR2	-0.34065	-2.18329	1.50199	0.717808	-1.07627	-2.72064	0.568099	0.2021	-0.814543	-2.02747	0.398379	0.189413	154624656	4	G	exonic	4q31.3
rs256962	TICAM2	-0.916857	-2.66735	0.833638	0.306996	-0.725002	-2.40376	0.953758	0.399039	-0.797007	-1.99785	0.403836	0.194636	114942711	5	T	ncRNA_intronic	5q22.3
rs8177352	TIRAP	1.63337	-1.31091	4.57764	0.279312	-3.19049	-5.6094	-0.771575	0.0109712	-1.23768	-3.10272	0.627352	0.194667	126153843	11	T	intronic	11q24.2
rs2569254	IL12B	1.66458	-0.95947	4.28863	0.216461	1.20127	-2.2415	4.64403	0.495407	1.36372	-0.696526	3.42397	0.195817	158751249	5	A	intronic	5q33.3
rs2952803	NOD1	-0.31342	-2.60246	1.97562	0.788939	-1.50834	-3.46057	0.443902	0.132662	-0.980954	-2.4642	0.502297	0.196204	30509645	7	T	intronic	7p14.3
rs2243270	IL4	-0.987545	-2.87262	0.897535	0.306971	-0.56983	-2.20241	1.06275	0.495269	-0.803733	-2.02324	0.415771	0.19778	132014109	5	T	intronic	5q31.1
rs2243136	IL12A	-0.220552	-2.18252	1.74142	0.826037	2.1115	0.165759	4.05725	0.0355409	0.900554	-0.490863	2.29197	0.2059	159713087	3	G	ncRNA_intronic	3q25.33
rs17313265	NOD2	-1.17712	-3.38301	1.02878	0.297985	-0.845837	-3.10476	1.41309	0.464486	-1.0215	-2.60161	0.558599	0.206418	50747704	16	G	intronic	16q12.1
rs2280235	STAT1	-0.187929	-1.94813	1.57227	0.834646	-1.13782	-2.72915	0.453513	0.163758	-0.758581	-1.93375	0.416591	0.2071	191843830	2	A	intronic	2q32.2
rs2066801	STAT1	-6.43024	-10.9686	-1.89186	0.00647834	0.408841	-2.42312	3.2408	0.777713	-1.46339	-3.76027	0.83349	0.213035	191865777	2	C	intronic	2q32.2
rs419939	TICAM2	-0.157502	-2.10031	1.78531	0.87405	1.7677	-0.00324174	3.53865	0.05282	0.818513	-0.480686	2.11771	0.218166	114926421	5	T	intronic	5q22.3
rs2975293	SLC6A3	2.69009	0.0643246	5.31586	0.0471616	-0.502759	-2.96025	1.95473	0.689178	1.13164	-0.67075	2.93403	0.219748	1417652	5	T	intronic	5p15.33
rs2937639	SLC6A3	1.60613	-0.228198	3.44045	0.089167	0.0880982	-1.55947	1.73566	0.916712	0.74819	-0.450513	1.94689	0.222482	1443728	5	T	intronic	5p15.33
rs2037955	NOD1	0.0684021	-1.70825	1.84506	0.93999	1.30234	-0.356063	2.96074	0.126483	0.750294	-0.458596	1.95918	0.22507	30511949	7	C	intronic	7p14.3
rs2069709	IFNG	2.02305	-1.62928	5.67539	0.280071	1.50509	-1.53401	4.54419	0.333731	1.38589	-0.853921	3.62571	0.226478	68553703	12	C	intronic	NA
rs10489625	IL12RB2	-1.15589	-3.88887	1.5771	0.408988	-1.63065	-4.34779	1.08648	0.241896	-1.18206	-3.09577	0.731653	0.227288	67814420	1	C	intronic	1p31.3
rs2279015	SLC11A1	-0.00136575	-2.29772	2.29499	0.999072	-1.73065	-4.07654	0.615239	0.150883	-0.969825	-2.5458	0.606147	0.229005	219259270	2	T	intronic	2q35
rs1532	IFNGR2	-0.0334877	-1.85545	1.78847	0.97133	-1.51296	-3.13706	0.111144	0.0704422	-0.74721	-1.96188	0.467462	0.229188	34804966	21	G	intronic	21q22.11
rs360714	IL18	0.63912	-1.18135	2.45959	0.492875	0.721647	-0.969371	2.41267	0.40463	0.756134	-0.477463	1.98973	0.230849	112032046	11	T	intronic	11q23.1
rs4988453	MYD88	-1.64927	-3.80469	0.506139	0.136624	0.0397471	-2.25822	2.33771	0.973014	-0.945266	-2.49047	0.599936	0.231766	38179254	3	A	upstream	3p22.2
rs17883885	IFNGR2	4.41174	-0.967703	9.79118	0.11091	0.570173	-3.10742	4.24776	0.761765	1.83248	-1.16779	4.83275	0.232505	34807557	21	C	intronic	NA
rs10893493	TIRAP	0.478671	-1.43319	2.39054	0.624618	1.31404	-0.54099	3.16907	0.167676	0.797545	-0.516813	2.1119	0.235547	126152647	11	G	upstream	11q24.2
rs2256023	NOD1	0.732313	-1.16915	2.63378	0.452025	0.764993	-0.936321	2.46631	0.379972	0.765677	-0.498382	2.02974	0.236384	30514991	7	C	intronic	7p14.3
rs1143643	IL1B	1.01	-0.854219	2.87421	0.290654	1.25255	-0.73078	3.23587	0.218284	0.794013	-0.52	2.10803	0.237498	113588302	2	G	intronic	2q13
rs2709803	NOD1	0.0196168	-1.75369	1.79292	0.982742	1.30234	-0.356063	2.96074	0.126483	0.721712	-0.486701	1.93013	0.242986	30510534	7	A	intronic	7p14.3
rs6894567	IL12B	-1.16277	-2.86039	0.534848	0.182306	-0.0952267	-1.78463	1.59417	0.91222	-0.70227	-1.88311	0.478573	0.244979	158756968	5	T	intronic	5q33.3
rs2276631	SLC11A1	0.149195	-1.66848	1.96687	0.8725	0.970897	-0.633177	2.57497	0.237917	0.699149	-0.49243	1.89073	0.251354	219249013	2	C	exonic	2q35
rs2201584	IL12RB2	0.572386	-1.84407	2.98884	0.643401	NA	NA	NA	NA	0.7072	-0.502717	1.91712	0.253151	67787715	1	A	intronic	1p31.3
rs3790568	IL12RB2	0.27949	-1.45686	2.01584	0.75301	0.982323	-0.746594	2.71124	0.267765	0.713215	-0.520192	1.94662	0.258261	67836060	1	T	intronic	1p31.3
rs748855	NOD2	-0.447252	-2.33161	1.4371	0.642738	1.6362	-0.0935986	3.36601	0.0662873	0.734328	-0.543012	2.01167	0.261025	50751398	16	T	intronic	16q12.1
rs2834215	IFNGR2	0.328173	-1.45702	2.11337	0.719328	-1.59013	-3.29478	0.114524	0.0700709	-0.71824	-1.97171	0.535228	0.262583	34796886	21	G	intronic	21q22.11
rs13029247	STAT1	0.117031	-1.64655	1.88061	0.896759	-0.925979	-2.5397	0.68774	0.263046	-0.682416	-1.87683	0.511999	0.263967	191866658	2	T	intronic	2q32.2
rs746566	TICAM2	0.427958	-1.34901	2.20492	0.63786	-1.65245	-3.27975	-0.0251427	0.0489115	-0.68468	-1.88816	0.518803	0.265992	114922047	5	C	intronic	5q22.3
rs8130924	IFNGR2	0.0517588	-1.76211	1.86563	0.955503	-1.51296	-3.13706	0.111144	0.0704422	-0.685483	-1.89829	0.527323	0.269115	34800872	21	G	intronic	21q22.11
rs5743373	NOD1	0.581772	-1.24231	2.40585	0.533221	-1.65632	-3.33798	0.0253516	0.0559918	-0.698699	-1.93682	0.53942	0.269861	30464961	7	A	UTR3	7p14.3
rs7536192	IL12RB2	0.27949	-1.45686	2.01584	0.75301	0.91437	-0.790198	2.61894	0.295265	0.690481	-0.537522	1.91848	0.271599	67854602	1	T	intronic	1p31.3
rs2856837	IL1A	0.349989	-1.60067	2.30065	0.725782	0.923283	-0.795943	2.64251	0.294718	0.716959	-0.561183	1.9951	0.272736	113541925	2	C	intronic	2q13
rs4963062	TOLLIP	-1.30733	-3.11262	0.497961	0.158727	-0.235109	-1.86524	1.39502	0.777922	-0.655158	-1.82859	0.518271	0.274974	1326641	11	A	intronic	11p15.5
rs1059823	SLC11A1	-0.303328	-2.44259	1.83594	0.781633	-0.917607	-3.05475	1.21953	0.401772	-0.822298	-2.29569	0.651095	0.275181	219259844	2	G	UTR3	2q35
rs17561	IL1A	0.261269	-1.77111	2.29365	0.801552	1.00185	-0.809776	2.81348	0.280655	0.744182	-0.591099	2.07946	0.275831	113537223	2	T	exonic	2q13
rs1800587	IL1A	0.794246	-1.17614	2.76463	0.431239	0.56258	-1.05547	2.18063	0.49693	0.679623	-0.540969	1.90021	0.276282	113542960	2	T	UTR5	2q13
rs2069842	IL6	-0.444411	-5.09848	4.20965	0.851895	-0.10795	-2.69846	2.48256	0.935045	-1.12557	-3.18161	0.930464	0.284411	22769310	7	T	intronic	7p15.3
rs11209063	IL12RB2	0.216329	-1.52091	1.95357	0.807645	0.939688	-0.823037	2.70241	0.298263	0.68095	-0.563222	1.92512	0.284526	67855142	1	C	intronic	1p31.3
rs360717	IL18	-0.985714	-3.16009	1.18866	0.376248	1.44706	-0.17621	3.07033	0.0832427	0.692278	-0.575269	1.95983	0.285542	112034725	11	C	UTR5	11q23.1
rs7869402	NOD1	-0.974732	-2.76942	0.81996	0.289492	-0.471034	-2.15794	1.21587	0.58523	-0.649829	-1.85357	0.553913	0.291135	120478032	9	T	UTR3	9q33.1
rs6685568	IL12RB2	0.216329	-1.52091	1.95357	0.807645	0.91437	-0.790198	2.61894	0.295265	0.661256	-0.566376	1.88889	0.292204	67855297	1	C	intronic	1p31.3
rs2856836	IL1A	0.209321	-1.84171	2.26035	0.841847	1.00185	-0.809776	2.81348	0.280655	0.719715	-0.621478	2.06091	0.294028	113532083	2	A	UTR3	2q13
rs40358	SLC6A3	-1.08397	-2.84162	0.673672	0.229416	-0.205154	-1.83169	1.42139	0.805181	-0.636893	-1.824	0.550212	0.294116	1416142	5	C	intronic	5p15.33
rs5743572	TLR1	1.41401	-1.52651	4.35452	0.348057	0.573007	-1.75323	2.89924	0.630151	0.965041	-0.835973	2.76605	0.294724	38805391	4	C	intronic	4p14
rs7355231	STAT1	0.500909	-1.72476	2.72658	0.660019	0.982059	-1.18018	3.1443	0.375198	0.801929	-0.715705	2.31956	0.301449	191870010	2	A	intronic	2q32.2
rs2307147	IL12RB2	0.428181	-1.29611	2.15247	0.627467	0.890452	-0.733582	2.51449	0.284757	0.624455	-0.559596	1.80851	0.302385	67787286	1	G	exonic	1p31.3
rs11647841	NOD2	-0.447252	-2.33161	1.4371	0.642738	1.5233	-0.244534	3.29113	0.0939278	0.679933	-0.610417	1.97028	0.302799	50743331	16	C	intronic	16q12.1
rs2963242	SLC6A3	1.3381	-0.619327	3.29553	0.183156	0.118711	-1.6727	1.91012	0.896884	0.694304	-0.627221	2.01583	0.304225	1437726	5	G	intronic	5p15.33
rs2111234	NOD2	0.98925	-0.908271	2.88677	0.309191	0.493176	-1.27385	2.2602	0.585406	0.673089	-0.609493	1.95567	0.304766	50734033	16	T	intronic	16q12.1
rs1059293	IFNGR2	0.465512	-1.32749	2.25851	0.611901	-1.59142	-3.19326	0.0104261	0.0539225	-0.628819	-1.82975	0.572116	0.305856	34809693	21	G	UTR3	21q22.11
rs2075820	NOD1	-0.247743	-2.05967	1.56418	0.789234	1.30697	-0.380459	2.99441	0.131713	0.643393	-0.589022	1.87581	0.307291	30492237	7	G	exonic	7p14.3
rs3135499	NOD2	-0.911922	-2.87543	1.05158	0.364714	-0.320712	-1.95879	1.31736	0.701874	-0.639618	-1.87001	0.590772	0.309328	50765376	16	T	intronic	16q12.1
rs9808753	IFNGR2	-0.579632	-2.39884	1.23958	0.533648	-0.649085	-2.32207	1.0239	0.448535	-0.634902	-1.8572	0.587391	0.309717	34787312	21	A	exonic	21q22.11
rs5743371	NOD1	1.09849	-1.55098	3.74796	0.418236	0.412722	-1.66739	2.49283	0.69807	0.843295	-0.783404	2.46999	0.310668	30465374	7	C	intronic	7p14.3
rs1861757	NOD2	-0.827041	-2.77971	1.12563	0.408305	2.35094	0.262334	4.43955	0.0293417	0.734822	-0.684466	2.15411	0.311291	50752815	16	C	intronic	16q12.1
rs2975634	NOD1	0.120383	-2.01117	2.25194	0.91207	-1.55092	-3.45865	0.356804	0.113787	-0.73264	-2.15151	0.68623	0.312594	30491693	7	G	exonic	7p14.3
rs458334	SLC6A3	-0.388564	-2.12561	1.34848	0.661945	-0.634827	-2.25978	0.990128	0.445398	-0.605714	-1.78581	0.57438	0.315467	1430093	5	A	intronic	5p15.33
rs10043094	TICAM2	0.643426	-1.15215	2.43901	0.484004	-1.57451	-3.17843	0.0293972	0.0567949	-0.608781	-1.80018	0.582621	0.317643	114919459	5	T	intronic	5q22.3
rs2284555	IFNGR2	0.496801	-1.30014	2.29374	0.589048	-1.59142	-3.19326	0.0104261	0.0539225	-0.610361	-1.81299	0.592267	0.320924	34806288	21	C	intronic	21q22.11
rs12091150	IL12RB2	0.384915	-1.3325	2.10233	0.661342	0.890452	-0.733582	2.51449	0.284757	0.595853	-0.586606	1.77831	0.324364	67789283	1	A	intronic	1p31.3
rs10521209	NOD2	-0.322329	-2.19943	1.55478	0.737112	1.31569	-0.394241	3.02562	0.134247	0.632315	-0.630799	1.89543	0.32755	50755709	16	C	intronic	16q12.1
rs2906766	NOD1	1.54628	-0.280609	3.37318	0.10014	0.0467699	-1.60524	1.69878	0.955844	0.594193	-0.613246	1.80163	0.335813	30499575	7	G	UTR5	7p14.3
rs7793010	NOD1	-0.479124	-2.52519	1.56694	0.647222	1.59291	-0.225915	3.41173	0.0887308	0.669807	-0.693281	2.03289	0.336524	30470153	7	A	intronic	7p14.3
rs2243261	IL4	0.86463	-1.4533	3.18256	0.466337	0.806222	-1.06655	2.679	0.400533	0.683889	-0.712024	2.0798	0.337957	132012806	5	A	intronic	5q31.1
rs7576974	SLC11A1	-0.537063	-2.54338	1.46926	0.600924	-1.06524	-2.98576	0.855279	0.279229	-0.663506	-2.01797	0.690961	0.338013	219247790	2	T	exonic	2q35
rs2043055	IL18	0.279119	-1.80264	2.36088	0.793225	1.0986	-1.03015	3.22734	0.313878	0.720552	-0.76032	2.20142	0.341263	112031624	11	T	intronic	11q23.1
rs3783572	IL1A	1.14082	-1.27077	3.55241	0.355934	0.930265	-2.07339	3.93392	0.545015	0.894994	-0.970493	2.76048	0.348044	113541382	2	A	intronic	2q13
rs11133768	SLC6A3	-2.48184	-4.14486	-0.818812	0.00419822	1.06903	-0.577542	2.7156	0.205733	-0.565104	-1.74798	0.617776	0.350073	1405723	5	A	intronic	5p15.33
rs9376267	IFNGR1	-0.249696	-2.59985	2.10046	0.835442	-0.739394	-2.79862	1.31984	0.48299	-0.727046	-2.2623	0.80821	0.354299	137531031	6	T	intronic	6q23.3
rs3783589	IL1A	0.061597	-3.40785	3.53105	0.972306	-1.39955	-3.55832	0.759222	0.206384	-0.849975	-2.66644	0.96649	0.360043	113531955	2	A	UTR3	2q13
rs250681	SLC6A3	-0.326009	-2.09648	1.44446	0.718893	-0.620107	-2.24776	1.00755	0.45674	-0.553268	-1.74493	0.638392	0.363795	1428011	5	A	intronic	5p15.33
rs1546159	IL12RB2	-1.1626	-2.8837	0.5585	0.188359	-0.0805285	-1.72803	1.56698	0.923842	-0.549545	-1.7392	0.64011	0.366216	67788426	1	C	intronic	1p31.3
rs2284554	IFNGR2	0.481022	-1.33639	2.29844	0.605029	-1.52178	-3.14033	0.096772	0.0679096	-0.560159	-1.77391	0.653595	0.366667	34806218	21	G	intronic	21q22.11
rs795467	IL18	-1.14095	-3.31812	1.03621	0.306668	1.35994	-0.276733	2.99661	0.106111	0.58928	-0.692558	1.87112	0.368517	112031080	11	T	intronic	11q23.1
rs3802813	TIRAP	2.10917	-0.824625	5.04297	0.161709	-2.3518	-4.5711	-0.132503	0.0400073	-0.811729	-2.57911	0.955657	0.368967	126162468	11	C	exonic	11q24.2
rs5743372	NOD1	0.745313	-1.07847	2.5691	0.424918	-1.56438	-3.23956	0.110802	0.0697636	-0.565652	-1.80223	0.670929	0.370896	30465035	7	C	UTR3	7p14.3
rs5743367	NOD1	0.0913048	-2.28782	2.47043	0.940183	1.05517	-0.934674	3.04502	0.300806	0.693524	-0.826247	2.21329	0.372051	30468378	7	T	intronic	7p14.3
rs5744259	IL18	0.246499	-1.97669	2.46969	0.828374	-2.0072	-5.28082	1.26643	0.231905	-0.797776	-2.56719	0.971632	0.377784	112021603	11	T	intronic	11q23.1
rs464049	SLC6A3	-0.300552	-2.04824	1.44714	0.73673	-0.598408	-2.2269	1.03009	0.472836	-0.529025	-1.7126	0.654545	0.381914	1423905	5	C	intronic	5p15.33
rs17129742	IL12RB2	-0.964073	-2.99268	1.06454	0.353729	-0.552477	-2.37404	1.26909	0.55336	-0.60648	-1.9699	0.75694	0.38421	67778803	1	T	intronic	1p31.3
rs352140	TLR9	-0.0684265	-1.78878	1.65193	0.938006	-1.16432	-2.88733	0.558701	0.187955	-0.533009	-1.73489	0.668869	0.385636	52256697	3	G	exonic	3p21.2
rs6876225	SLC6A3	-2.17252	-4.17531	-0.16973	0.0358163	0.928109	-0.951929	2.80815	0.335265	-0.607336	-1.98797	0.773293	0.389487	1406036	5	G	intronic	5p15.33
rs2235099	NOD1	-0.480443	-2.38099	1.4201	0.621312	1.30697	-0.380459	2.99441	0.131713	0.553102	-0.707335	1.81354	0.390659	30492550	7	T	exonic	7p14.3
rs5743869	TOLLIP	0.236996	-4.4354	4.90939	0.920996	-1.34007	-3.77528	1.09513	0.283016	-0.839995	-2.75843	1.07844	0.39169	1327752	11	T	intronic	11p15.5
rs2243266	IL4	0.896787	-0.871856	2.66543	0.322598	0.256738	-1.43608	1.94956	0.7668	0.527816	-0.690121	1.74575	0.396556	132013789	5	T	intronic	5q31.1
rs2268241	IFNGR2	-0.0474844	-1.81218	1.71721	0.958038	0.952651	-0.667668	2.57297	0.251541	0.512365	-0.677368	1.7021	0.399507	34781050	21	T	intronic	21q22.11
rs17129792	IL12RB2	-0.605599	-3.90691	2.69571	0.719902	1.24781	-1.10253	3.59814	0.300236	0.796234	-1.07101	2.66348	0.404155	67792499	1	A	exonic	1p31.3
rs2695343	SLC11A1	-0.138516	-1.96881	1.69178	0.882365	-0.991908	-2.79743	0.813613	0.283815	-0.545203	-1.82498	0.734576	0.404607	219255423	2	C	intronic	2q35
rs3731863	SLC11A1	0.0435087	-2.03905	2.12607	0.967414	1.12466	-0.793767	3.04308	0.252907	0.59035	-0.803089	1.98379	0.407192	219252208	2	G	intronic	2q35
rs2066446	IL12RB2	-0.110909	-1.88012	1.6583	0.902441	-0.982297	-2.68147	0.716874	0.259516	-0.515153	-1.73228	0.701974	0.407646	67781117	1	T	intronic	1p31.3
rs376008	IL12RB1	-0.366028	-2.19515	1.46309	0.695677	-0.778584	-2.43608	0.878908	0.359127	-0.514595	-1.73575	0.706562	0.4097	18189568	19	A	intronic	19p13.11
rs2069718	IFNG	0.111105	-1.68201	1.90422	0.903566	0.768908	-0.91261	2.45043	0.371976	0.515784	-0.70948	1.74105	0.41019	68550162	12	A	intronic	12q15
rs7781700	NOD1	-0.47931	-2.81946	1.86084	0.688884	-0.713912	-2.7585	1.33068	0.495104	-0.64265	-2.1698	0.884504	0.410344	30497532	7	A	intronic	7p14.3
rs382634	IL12RB1	-0.366028	-2.19515	1.46309	0.695677	-0.72383	-2.38219	0.934533	0.394046	-0.510373	-1.73272	0.71197	0.413999	18187562	19	T	intronic	19p13.11
rs16833157	STAT1	-2.22739	-4.3592	-0.0955848	0.0430204	0.475001	-1.38956	2.33957	0.618504	-0.581367	-1.98922	0.826486	0.419144	191862398	2	A	intronic	2q32.2
rs1143634	IL1B	0.124052	-1.88953	2.13763	0.904115	-1.03544	-3.10058	1.0297	0.32779	-0.584924	-2.0074	0.837556	0.42111	113590390	2	A	exonic	2q13
rs2052834	TICAM2	0.729274	-1.3618	2.82035	0.495758	0.314405	-1.69202	2.32083	0.759294	0.580656	-0.832759	1.99407	0.421549	114952645	5	T	ncRNA_intronic	5q22.3
rs5743356	NOD1	-0.17864	-2.57272	2.21544	0.883999	0.927231	-0.819249	2.67371	0.300229	0.552411	-0.802475	1.9073	0.425049	30485999	7	G	intronic	7p14.3
rs16833146	STAT1	0.409755	-1.43921	2.25872	0.664952	0.414968	-1.28264	2.11258	0.632764	0.506399	-0.741274	1.75407	0.427164	191848286	2	T	intronic	2q32.2
rs10052016	SLC6A3	1.47329	-0.353983	3.30056	0.116989	-0.287865	-1.99273	1.417	0.741284	0.505058	-0.740726	1.75084	0.427666	1428111	5	A	intronic	5p15.33
rs3783591	IL1A	0.854106	-1.5117	3.21991	0.480731	0.930265	-2.07339	3.93392	0.545015	0.744877	-1.09484	2.5846	0.428267	113531514	2	T	UTR3	2q13
rs10173099	STAT1	-0.252062	-2.17668	1.67256	0.797911	-0.542662	-2.2819	1.19658	0.542038	-0.521255	-1.81986	0.777351	0.432258	191867332	2	A	intronic	2q32.2
rs34997637	STAT1	-0.153546	-1.98377	1.67668	0.8697	-0.407451	-2.10129	1.28639	0.638186	-0.497076	-1.73684	0.74269	0.432772	191858830	2	G	intronic	2q32.2
rs11536887	NOD1	1.09789	-2.06904	4.26482	0.498302	0.32866	-1.95875	2.61607	0.778739	0.726905	-1.10602	2.55983	0.437788	120477674	9	A	UTR3	9q33.1
rs3790562	IL12RB2	-1.05123	-2.76821	0.665757	0.232784	0.0488902	-1.59166	1.68944	0.953522	-0.466156	-1.65337	0.721061	0.442342	67794423	1	C	intronic	1p31.3
rs2030171	STAT1	-0.187304	-2.07093	1.69632	0.845842	-0.658002	-2.38798	1.07197	0.457482	-0.494934	-1.77463	0.784762	0.449205	191869163	2	G	intronic	2q32.2
rs6873889	TICAM2	0.583718	-3.12444	4.29188	0.758288	1.7792	-1.95599	5.5144	0.352441	0.990159	-1.5711	3.55142	0.44941	114930364	5	T	intronic	NA
rs12109315	TICAM2	4.51195	-0.398469	9.42237	0.0745541	-2.02563	-4.57716	0.525889	0.122426	-0.834636	-2.99363	1.32435	0.449411	114934350	5	C	intronic	5q22.3
rs11894425	STAT1	-1.0326	-2.87787	0.812655	0.275185	0.0778691	-1.89744	2.05318	0.938545	-0.516405	-1.85683	0.824022	0.450969	191837841	2	A	intronic	2q32.2
rs8046608	NOD2	0.411446	-1.67861	2.5015	0.700379	0.29556	-1.5165	2.10762	0.749778	0.515753	-0.827424	1.85893	0.452466	50730881	16	G	upstream	16q12.1
rs3829223	TOLLIP	-1.21108	-2.98819	0.56604	0.184506	1.91175	0.325714	3.49779	0.0198165	0.453022	-0.727846	1.63389	0.452876	1300406	11	A	intronic	11p15.5
rs2075821	NOD1	0.184771	-1.61374	1.98328	0.840802	0.635102	-1.13623	2.40644	0.483622	0.478821	-0.770893	1.72854	0.453453	30491311	7	G	exonic	7p14.3
rs2834210	IFNGR2	0.51876	-1.28938	2.3269	0.575057	-1.18585	-2.87353	0.501834	0.171105	-0.477284	-1.72305	0.768483	0.453469	34786574	21	A	intronic	21q22.11
rs751271	NOD2	0.768951	-1.11989	2.6578	0.426685	0.316203	-1.46118	2.09359	0.727954	0.492023	-0.794963	1.77901	0.454437	50751175	16	T	intronic	16q12.1
rs5743867	TOLLIP	-0.871705	-2.64732	0.903907	0.338105	-0.06302	-1.69339	1.56735	0.939739	-0.438579	-1.60664	0.729487	0.46253	1328351	11	A	intronic	11p15.5
rs2243268	IL4	1.10754	-0.689504	2.90458	0.229721	-0.195736	-1.81808	1.4266	0.813481	0.440274	-0.750169	1.63072	0.469265	132013963	5	T	intronic	5q31.1
rs2709800	NOD1	-0.0326635	-1.99922	1.93389	0.974091	0.701765	-1.0117	2.41523	0.423769	0.474246	-0.812576	1.76107	0.47083	30512771	7	A	intronic	7p14.3
rs6853	MYD88	-0.792149	-2.54191	0.957617	0.376894	-0.185493	-1.8539	1.48292	0.827881	-0.434686	-1.62257	0.753203	0.473969	38184370	3	A	UTR3	3p22.2
rs2243290	IL4	0.658544	-1.07565	2.39274	0.458348	0.286755	-1.42463	1.99814	0.743192	0.442061	-0.76918	1.6533	0.475139	132018169	5	T	intronic	5q31.1
rs12344353	NOD1	-2.12478	-4.0665	-0.183066	0.0342323	0.626313	-1.06712	2.31974	0.469971	-0.462195	-1.7411	0.81671	0.479457	120468649	9	A	intronic	9q33.1
rs2066802	STAT1	-0.399122	-2.36057	1.56232	0.690814	1.36298	-0.512052	3.23801	0.156916	0.485195	-0.870802	1.84119	0.483821	191874667	2	A	exonic	2q32.2
rs4986790	NOD1	-0.404356	-3.20991	2.4012	0.778114	1.54033	-1.07613	4.15679	0.250928	0.67595	-1.2327	2.5846	0.488303	120475302	9	T	exonic	9q33.1
rs5743824	TLR6	1.38867	-2.31883	5.09617	0.46449	0.603107	-1.71444	2.92065	0.610978	0.669506	-1.23201	2.57102	0.490837	38828470	4	G	UTR3	4p14
rs360722	IL18	0.477771	-1.29452	2.25006	0.598333	-0.861464	-2.41267	0.689742	0.278636	-0.407484	-1.57803	0.763063	0.49574	112026703	11	T	intronic	11q23.1
rs2906773	NOD1	-1.4394	-3.18386	0.305053	0.108768	0.390227	-1.25557	2.03602	0.642999	-0.417677	-1.62367	0.788319	0.497944	30506644	7	T	intronic	7p14.3
rs8120	TICAM1	0.748545	-1.03273	2.52982	0.411987	0.257385	-1.38888	1.90364	0.759822	0.409192	-0.784522	1.60291	0.502352	4816160	19	G	UTR3	19p13.3
rs8177376	TIRAP	-1.38563	-4.33055	1.5593	0.358619	-0.488706	-2.82868	1.85127	0.683039	-0.619365	-2.43378	1.19505	0.504153	126163612	11	G	UTR3	11q24.2
rs10208033	STAT1	0.27095	-1.49436	2.03626	0.764137	0.446181	-1.2426	2.13496	0.605557	0.409932	-0.792611	1.61247	0.504726	191879417	2	C	intronic	NA
rs429774	IL12RB1	-0.165861	-2.01658	1.68486	0.860901	-0.72383	-2.38219	0.934533	0.394046	-0.411781	-1.64122	0.817656	0.512185	18186752	19	G	intronic	19p13.11
rs625413	TIRAP	-0.773447	-3.12275	1.57585	0.52014	1.54903	-2.08391	5.18197	0.405034	-0.587388	-2.36446	1.18968	0.517734	126164349	11	G	UTR3	11q24.2
rs4696483	TLR2	-2.41905	-4.372	-0.466102	0.0168599	1.3069	-0.676378	3.29017	0.199077	-0.457784	-1.85956	0.943989	0.522759	154619255	4	A	intronic	4q31.3
rs13010343	STAT1	0.521798	-1.83973	2.88333	0.66583	-1.89123	-4.56202	0.779568	0.167827	-0.56878	-2.31734	1.17978	0.5244	191843445	2	G	intronic	2q32.2
rs3816560	SLC11A1	-0.322849	-2.09285	1.44715	0.721411	0.661355	-0.976844	2.29956	0.430402	0.38492	-0.800471	1.57031	0.525118	219254842	2	T	intronic	2q35
rs7203344	NOD2	-0.0278585	-1.78246	1.72674	0.975233	0.680803	-0.933377	2.29498	0.410128	0.380458	-0.798773	1.55969	0.527789	50759547	16	T	intronic	16q12.1
rs2243123	IL12A	0.846656	-1.01086	2.70417	0.373684	0.136273	-1.70122	1.97377	0.88468	0.41654	-0.881568	1.71465	0.530028	159709651	3	G	ncRNA_intronic	3q25.33
rs1816702	TLR2	-2.47153	-4.40479	-0.538256	0.013727	1.33436	-0.630723	3.29945	0.185829	-0.445649	-1.83542	0.944124	0.530306	154609523	4	G	intronic	4q31.3
rs1927910	NOD1	1.71629	-0.306613	3.7392	0.0992277	-0.544803	-2.38652	1.29691	0.563178	0.432508	-0.928062	1.79308	0.533865	120470148	9	A	intronic	9q33.1
rs13395505	STAT1	-0.85002	-2.72412	1.02408	0.376007	0.0778691	-1.89744	2.05318	0.938545	-0.429802	-1.78431	0.924703	0.534607	191838514	2	G	intronic	2q32.2
rs17129749	IL12RB2	0.866507	-0.867842	2.60086	0.329688	-0.0680393	-1.68271	1.54663	0.934319	0.3708	-0.807476	1.54908	0.53798	67779751	1	G	intronic	1p31.3
rs5743285	NOD2	2.08029	-3.30533	7.46592	0.450648	NA	NA	NA	NA	1.47381	-3.3272	6.27482	0.547984	50750791	16	G	intronic	NA
rs11209052	IL12RB2	0.266067	-1.96227	2.49441	0.815415	1.16554	-1.05281	3.38388	0.305246	0.477409	-1.09166	2.04648	0.551533	67807734	1	T	intronic	1p31.3
rs2243115	IL12A	-0.890518	-3.00053	1.2195	0.409962	1.92235	-0.180732	4.02543	0.0758102	0.455117	-1.04605	1.95628	0.552951	159706280	3	G	ncRNA_intronic	3q25.33
rs2970499	NOD1	-0.148129	-2.70298	2.40672	0.909736	1.28277	-1.24349	3.80903	0.321691	0.540549	-1.24683	2.32793	0.553934	30478421	7	A	intronic	7p14.3
rs28363169	SLC6A3	-1.10768	-3.91511	1.69975	0.441035	-0.256638	-3.85324	3.33996	0.889017	-0.6464	-2.82292	1.53012	0.56108	1394234	5	C	UTR3	5p15.33
rs5743336	NOD1	0.627821	-1.2146	2.47024	0.50567	0.121043	-1.51825	1.76033	0.88518	0.35934	-0.856562	1.57524	0.563	30498806	7	T	UTR5	7p14.3
rs27048	SLC6A3	0.460653	-1.2905	2.21181	0.607203	0.23267	-1.393	1.85834	0.779579	0.349031	-0.836484	1.53455	0.564475	1412645	5	G	intronic	5p15.33
rs4722988	NOD1	2.0476	-0.56569	4.66089	0.127558	-0.0572323	-2.10065	1.98619	0.956316	0.451777	-1.08695	1.9905	0.565544	30512030	7	T	intronic	7p14.3
rs4655538	IL12RB2	-0.711697	-2.42496	1.00156	0.417326	-0.0805285	-1.72803	1.56698	0.923842	-0.348031	-1.53368	0.837623	0.565634	67786902	1	G	intronic	1p31.3
rs256944	TICAM2	-0.469795	-2.43741	1.49782	0.640752	-0.342574	-2.41177	1.72662	0.746148	-0.405047	-1.81781	1.00772	0.574707	114929662	5	T	intronic	5q22.3
rs365179	IL12RB1	-0.617427	-2.46207	1.22721	0.513207	-0.295845	-1.97601	1.38432	0.730631	-0.348728	-1.57747	0.880016	0.578576	18181278	19	A	intronic	19p13.11
rs4297265	IL12RB2	0.651322	-1.20564	2.50828	0.493279	0.0986371	-1.84391	2.04118	0.920894	0.375026	-0.957746	1.7078	0.581817	67852335	1	C	exonic	1p31.3
rs5743604	TLR1	-0.51734	-2.20266	1.16798	0.548675	-0.0683086	-1.70793	1.57132	0.935061	-0.329201	-1.50188	0.843482	0.582707	38801285	4	C	intronic	4p14
rs3783587	IL1A	-0.846759	-4.00248	2.30896	0.600024	1.21932	-1.63022	4.06886	0.403371	0.559228	-1.44165	2.56011	0.584361	113533684	2	T	intronic	2q13
rs2737196	NOD1	1.456	-0.527376	3.43937	0.153088	-0.580798	-2.53696	1.37536	0.561737	0.380787	-1.01439	1.77596	0.593206	120469664	9	T	intronic	9q33.1
rs11209046	IL12RB2	0.805685	-1.44773	3.0591	0.484977	-0.0302946	-2.28263	2.22204	0.979013	0.425508	-1.15452	2.00553	0.598128	67773649	1	G	UTR5	1p31.3
rs16824035	STAT1	0.925171	-0.89556	2.7459	0.321527	-0.10083	-1.81424	1.61258	0.908374	0.332364	-0.904222	1.56895	0.598845	191837634	2	G	intronic	2q32.2
rs17159043	NOD1	0.57633	-1.15874	2.3114	0.516414	-1.16805	-2.81552	0.479428	0.167304	-0.318829	-1.51016	0.872501	0.60041	30469270	7	T	intronic	7p14.3
rs8177365	TIRAP	-1.39392	-3.49468	0.70684	0.196216	0.198751	-1.60166	1.99917	0.829081	-0.366181	-1.74418	1.01182	0.602985	126159860	11	A	intronic	11q24.2
rs1927912	NOD1	1.43419	-0.561699	3.43008	0.161911	-0.580798	-2.53696	1.37536	0.561737	0.371302	-1.02787	1.77047	0.603476	120469426	9	G	intronic	9q33.1
rs5743832	TLR6	-0.957172	-3.31186	1.39752	0.427371	0.16772	-2.45844	2.79388	0.900602	-0.458571	-2.18753	1.27039	0.603673	38827035	4	C	UTR3	4p14
rs3783575	IL1A	0.981729	-1.34171	3.30517	0.409404	0.274587	-2.12062	2.6698	0.822612	0.420595	-1.22229	2.06348	0.616304	113539873	2	A	intronic	2q13
rs881089	IL12RB2	0.651322	-1.20564	2.50828	0.493279	0.00790056	-1.92233	1.93814	0.993613	0.338591	-0.989618	1.6668	0.617804	67846742	1	G	intronic	1p31.3
rs12134497	IL12RB2	0.651322	-1.20564	2.50828	0.493279	0.00790056	-1.92233	1.93814	0.993613	0.338591	-0.989618	1.6668	0.617804	67851457	1	A	intronic	1p31.3
rs13339578	NOD2	0.816107	-1.04792	2.68013	0.392741	0.0322434	-1.63403	1.69851	0.969811	0.313651	-0.923709	1.55101	0.619788	50739105	16	G	intronic	16q12.1
rs7548737	IL12RB2	0.647746	-1.22809	2.52358	0.500001	0.00790056	-1.92233	1.93814	0.993613	0.33144	-1.00193	1.66481	0.626586	67851234	1	A	intronic	1p31.3
rs2075819	NOD1	-0.25067	-2.1865	1.68516	0.800137	0.867292	-1.3393	3.07389	0.442647	0.354019	-1.07738	1.78542	0.628317	30494622	7	C	intronic	7p14.3
rs2550936	SLC6A3	1.13845	-0.68544	2.96233	0.223915	-0.361664	-1.96793	1.2446	0.65981	0.29606	-0.911845	1.50397	0.631407	1411256	5	C	intronic	5p15.33
rs1046673	TICAM1	0.0463884	-1.79672	1.8895	0.960753	-0.515149	-2.18255	1.15225	0.545997	-0.297531	-1.51224	0.917178	0.63164	4816241	19	G	UTR3	19p13.3
rs8057341	NOD2	0.215046	-1.61607	2.04616	0.818399	0.462306	-1.35911	2.28372	0.619792	0.310726	-0.969767	1.59122	0.634807	50737980	16	A	intronic	16q12.1
rs6349	SLC6A3	-0.16748	-2.16122	1.82626	0.869539	-0.660654	-2.72623	1.40492	0.531965	-0.338876	-1.74133	1.06358	0.636245	1403073	5	G	exonic	5p15.33
rs460700	SLC6A3	-1.69836	-3.42944	0.0327249	0.05717	0.655019	-0.983987	2.29403	0.435046	-0.285182	-1.46648	0.896118	0.636546	1429969	5	T	intronic	5p15.33
rs5030710	NOD1	-0.0262355	-1.90923	1.85676	0.978265	-0.604665	-2.33576	1.12642	0.494948	-0.305937	-1.57601	0.964137	0.63729	120474721	9	A	exonic	9q33.1
rs2243132	IL12A	0.67263	-4.0505	5.39576	0.780686	0.693509	-2.62673	4.01375	0.683008	0.536136	-1.71145	2.78372	0.640563	159712230	3	C	intronic	NA
rs11536866	TLR4	-3.13265	-6.40863	0.143321	0.0636234	1.52617	-1.51039	4.56274	0.326629	-0.520595	-2.75843	1.71724	0.648852	120466218	9	A	upstream	NA
rs5743608	TLR1	-0.37499	-2.49206	1.74208	0.729152	1.30247	-0.836259	3.4412	0.23506	0.344606	-1.151	1.84021	0.651982	38800672	4	T	intronic	4p14
rs5743808	TLR6	0.0805595	-1.97694	2.13806	0.938972	-0.450403	-2.1196	1.21879	0.597905	-0.290375	-1.55282	0.97207	0.652548	38830736	4	T	exonic	4p14
rs5743839	TLR9	-0.99037	-3.61176	1.63102	0.460668	1.00933	-1.19464	3.2133	0.371257	0.381626	-1.30557	2.06883	0.657952	52260404	3	A	upstream	3p21.2
rs5743368	NOD1	-0.0288937	-1.84402	1.78623	0.975168	0.483331	-1.25848	2.22514	0.587571	0.278906	-0.980108	1.53792	0.664558	30468216	7	A	intronic	7p14.3
rs10072058	SLC6A3	0.883962	-0.885808	2.65373	0.329799	-0.441861	-2.05979	1.17607	0.59348	0.260534	-0.926435	1.4475	0.667449	1407379	5	T	intronic	5p15.33
rs3024498	IL10	-0.362204	-2.67888	1.95447	0.759865	0.747639	-1.30554	2.80082	0.47684	0.327139	-1.17694	1.83122	0.67029	206941529	1	A	UTR3	1q32.1
rs17129782	IL12RB2	0.574275	-2.47345	3.622	0.712614	-0.433902	-3.32615	2.45835	0.76925	0.44559	-1.60373	2.49491	0.670386	67787975	1	G	intronic	NA
rs4272257	NOD1	-1.58173	-7.75155	4.58809	0.616438	0.610877	-1.81027	3.03202	0.62187	0.473319	-1.72863	2.67527	0.673938	30503849	7	T	intronic	7p14.3
rs5743899	TOLLIP	-0.710846	-2.96157	1.53988	0.537253	-0.281113	-2.06216	1.49994	0.757605	-0.287928	-1.65039	1.07454	0.67912	1323564	11	G	intronic	11p15.5
rs17395548	TICAM2	-0.852301	-3.5347	1.8301	0.534775	-0.224456	-2.41526	1.96635	0.841199	-0.342955	-1.98608	1.30017	0.682856	114930295	5	G	intronic	5q22.3
rs3793964	TOLLIP	0.259415	-1.48516	2.00399	0.771278	0.259694	-1.3656	1.88498	0.75471	0.246129	-0.938328	1.43059	0.684182	1301982	11	G	intronic	11p15.5
rs5030718	NOD1	-0.919487	-4.12702	2.28805	0.575407	-0.000733588	-3.53668	3.53521	0.999676	-0.454181	-2.66472	1.75636	0.687546	120475826	9	A	exonic	9q33.1
rs5030729	NOD1	0.397977	-1.46655	2.2625	0.676526	-0.934363	-2.70615	0.837425	0.303465	-0.25955	-1.54446	1.02536	0.692536	120474339	9	C	intronic	9q33.1
rs12693590	STAT1	1.22434	-0.872242	3.32093	0.254961	-1.61648	-3.58179	0.348825	0.109654	-0.288081	-1.71675	1.14059	0.693052	191858636	2	A	intronic	2q32.2
rs7576984	STAT1	-1.5815	-3.56977	0.406778	0.121975	0.711178	-1.15446	2.57682	0.456487	-0.273128	-1.63246	1.08621	0.694085	191868583	2	T	intronic	2q32.2
rs9376268	IFNGR1	-1.37359	-4.08673	1.33954	0.323289	-0.437524	-3.61335	2.7383	0.787622	-0.401678	-2.4112	1.60784	0.695587	137532751	6	T	intronic	6q23.3
rs1003199	IL12B	1.16916	-0.627325	2.96565	0.204842	-0.700692	-2.51774	1.11636	0.451291	0.252052	-1.01592	1.52003	0.697183	158755566	5	G	intronic	5q33.3
rs2069714	IFNG	0.187532	-2.53784	2.9129	0.892973	-0.539238	-3.14019	2.06172	0.685232	-0.367053	-2.21421	1.48011	0.69729	68551044	12	C	intronic	12q15
rs4722987	NOD1	2.0476	-0.56569	4.66089	0.127558	-0.368199	-2.44945	1.71305	0.729409	0.307009	-1.24043	1.85445	0.697742	30504700	7	A	intronic	7p14.3
rs6948524	NOD1	2.0476	-0.56569	4.66089	0.127558	-0.368199	-2.44945	1.71305	0.729409	0.307009	-1.24043	1.85445	0.697742	30505172	7	G	intronic	7p14.3
rs4720003	NOD1	2.0476	-0.56569	4.66089	0.127558	-0.368199	-2.44945	1.71305	0.729409	0.307009	-1.24043	1.85445	0.697742	30508992	7	T	intronic	7p14.3
rs6348	SLC6A3	-0.894151	-2.66668	0.87838	0.325052	0.213595	-1.41324	1.84043	0.797374	-0.234878	-1.42251	0.952758	0.698654	1420801	5	G	exonic	5p15.33
rs256946	TICAM2	-0.530444	-2.72344	1.66255	0.636414	0.530773	-1.29719	2.35874	0.570381	0.276485	-1.12361	1.67658	0.69908	114931610	5	A	intronic	5q22.3
rs16833155	STAT1	0.462963	-2.97208	3.89801	0.792163	-1.44833	-5.29834	2.40168	0.46241	-0.496092	-3.0338	2.04162	0.701961	191861377	2	C	intronic	NA
rs932272	NOD1	1.30582	-0.415057	3.0267	0.139885	-0.734772	-2.38288	0.913338	0.384021	0.230888	-0.957767	1.41954	0.703769	30513159	7	G	intronic	7p14.3
rs10040882	SLC6A3	0.99941	-0.953496	2.95232	0.318084	-0.450287	-2.33234	1.43176	0.639995	0.260823	-1.0917	1.61334	0.705802	1418558	5	A	intronic	5p15.33
rs2907748	NOD1	-1.34183	-3.96944	1.28578	0.319174	1.57452	-0.71427	3.86331	0.180177	0.333734	-1.40194	2.06941	0.706626	30473023	7	A	intronic	7p14.3
rs4722986	NOD1	2.02305	-0.577827	4.62393	0.130321	-0.368199	-2.44945	1.71305	0.729409	0.293754	-1.24941	1.83691	0.709419	30504523	7	T	intronic	7p14.3
rs2893375	NOD1	2.02305	-0.577827	4.62393	0.130321	-0.368199	-2.44945	1.71305	0.729409	0.293754	-1.24941	1.83691	0.709419	30510853	7	T	intronic	7p14.3
rs3804100	TLR2	-1.55182	-4.38053	1.27688	0.284679	0.206922	-2.03237	2.44621	0.856594	-0.330946	-2.07569	1.4138	0.710405	154625409	4	G	exonic	4q31.3
rs732038	NOD1	2.00999	-0.605726	4.6257	0.135011	-0.368199	-2.44945	1.71305	0.729409	0.28788	-1.25981	1.83557	0.715771	30505920	7	G	intronic	7p14.3
rs11887394	STAT1	0.765036	-2.15471	3.68478	0.608627	-0.593915	-2.70187	1.51404	0.581855	-0.304141	-1.95991	1.35163	0.719164	191858165	2	G	intronic	2q32.2
rs409588	SLC6A3	-1.18146	-3.05696	0.694029	0.219699	0.346415	-1.3926	2.08543	0.696931	-0.230722	-1.49798	1.03653	0.72154	1430834	5	A	intronic	5p15.33
rs3181221	IL12B	-2.455	-7.82072	2.91073	0.371858	NA	NA	NA	NA	-0.844793	-5.48937	3.79979	0.721796	158747158	5	A	intronic	NA
rs549908	IL18	-1.10864	-3.41872	1.20143	0.34901	0.744422	-0.968099	2.45694	0.39597	0.242609	-1.11615	1.60137	0.72669	112020916	11	G	exonic	11q23.1
rs6350	SLC6A3	-0.183719	-3.4869	3.11946	0.913396	-0.424318	-2.79579	1.94716	0.726454	-0.340875	-2.25434	1.57259	0.727288	1443199	5	T	exonic	5p15.33
rs2229546	IL12RB2	0.37952	-1.45889	2.21793	0.686563	-0.758525	-2.4292	0.912148	0.375369	-0.215007	-1.43708	1.00706	0.730536	67861520	1	G	exonic	1p31.3
rs3882891	IL18	-0.0316375	-1.9185	1.85522	0.973844	0.572101	-1.36994	2.51414	0.564793	0.230209	-1.10042	1.56084	0.734851	112014761	11	T	intronic	11q23.1
rs893629	TLR2	0.750616	-1.19434	2.69558	0.451107	0.248627	-1.76035	2.2576	0.80877	0.240299	-1.15056	1.63115	0.735204	154604968	4	A	upstream	4q31.3
rs1495964	IL12RB2	-2.55714	-6.37377	1.2595	0.191927	1.18988	-2.29097	4.67074	0.50419	-0.438311	-2.98061	2.10399	0.735736	67794818	1	G	intronic	NA
rs4833095	TLR1	0.161882	-2.41816	2.74193	0.902355	-1.23246	-3.72148	1.25655	0.333809	-0.300596	-2.04716	1.44597	0.736178	38799710	4	T	exonic	4p14
rs2243131	IL12A	0.0369601	-1.71916	1.79308	0.967173	-0.301745	-1.95453	1.35104	0.721118	-0.204951	-1.39735	0.987452	0.736514	159712058	3	T	ncRNA_exonic	3q25.33
rs11564772	SLC6A3	-1.95852	-4.02427	0.107232	0.0658558	1.4245	-0.500816	3.34981	0.149712	-0.242192	-1.66526	1.18087	0.739007	1398007	5	C	intronic	NA
rs11536877	NOD1	1.44494	-0.652971	3.54285	0.17988	-0.697441	-2.61694	1.22206	0.477797	0.239539	-1.17178	1.65085	0.739692	120471358	9	T	intronic	9q33.1
rs4624663	TLR1	-0.420638	-2.45105	1.60977	0.685516	1.30247	-0.836259	3.4412	0.23506	0.240991	-1.20983	1.69181	0.745049	38797876	4	T	UTR3	4p14
rs11693463	STAT1	-1.86396	-3.64151	-0.0863995	0.0424084	1.22306	-0.437265	2.88339	0.151487	-0.199754	-1.42503	1.02552	0.74962	191869911	2	T	intronic	2q32.2
rs6347	SLC6A3	-0.0340798	-1.87603	1.80787	0.971139	0.217602	-1.59396	2.02917	0.814289	0.1988	-1.08384	1.48144	0.761566	1411412	5	G	exonic	5p15.33
rs2042449	SLC6A3	0.248232	-1.92997	2.42644	0.823689	0.0478186	-1.91529	2.01093	0.962003	0.224451	-1.22772	1.67662	0.762213	1416646	5	C	intronic	5p15.33
rs7864330	NOD1	-1.7445	-3.80503	0.316037	0.100141	0.626313	-1.06712	2.31974	0.469971	-0.200386	-1.50387	1.1031	0.763458	120469550	9	G	intronic	9q33.1
rs256997	TICAM2	-0.0230616	-1.80101	1.75489	0.979765	0.267755	-1.40536	1.94087	0.754338	0.187177	-1.04238	1.41674	0.765691	114918842	5	G	intronic	5q22.3
rs7562024	STAT1	0.468739	-1.75165	2.68912	0.680308	-0.77692	-2.59965	1.04581	0.405192	-0.210567	-1.60748	1.18634	0.767974	191855521	2	T	intronic	2q32.2
rs845375	IL12RB1	0.999345	-0.953134	2.95182	0.318051	-1.22633	-3.10542	0.652768	0.203405	-0.201071	-1.55635	1.15421	0.771478	18193166	19	G	intronic	19p13.11
rs3783550	IL1A	-0.731894	-2.50297	1.03919	0.419775	-0.050922	-1.72016	1.61832	0.952424	-0.176996	-1.37115	1.01716	0.771692	113532885	2	T	intronic	2q13
rs5743993	TOLLIP	-1.68277	-4.7591	1.39356	0.286073	0.807661	-2.2104	3.82573	0.600922	-0.310514	-2.46432	1.8433	0.777761	1304340	11	G	intronic	11p15.5
rs4720004	NOD1	-1.53754	-5.19074	2.11565	0.411254	0.610877	-1.81027	3.03202	0.62187	-0.278277	-2.21257	1.65602	0.778219	30512219	7	T	intronic	7p14.3
rs2012075	IFNGR2	-1.60938	-3.69174	0.472981	0.132825	1.58991	-0.848834	4.02864	0.203872	-0.223363	-1.78364	1.33691	0.779284	34796762	21	T	intronic	21q22.11
rs4235232	TLR2	0.712749	-1.17972	2.60522	0.46202	0.222761	-1.72778	2.1733	0.823275	0.191548	-1.15382	1.53692	0.780454	154618084	4	G	intronic	4q31.3
rs5743812	TLR6	-0.932152	-3.16762	1.30331	0.415597	0.729382	-1.60149	3.06025	0.54086	-0.226318	-1.82671	1.37407	0.7819	38830234	4	G	exonic	4p14
rs7727636	TICAM2	1.45516	-1.44161	4.35193	0.32705	-1.53623	-5.16433	2.09186	0.40829	0.315323	-1.9152	2.54585	0.78197	114920825	5	T	intronic	5q22.3
rs3790567	IL12RB2	-0.118577	-1.93466	1.69751	0.89841	-0.170027	-2.09139	1.75134	0.862604	-0.183206	-1.49231	1.1259	0.784105	67822377	1	C	intronic	1p31.3
rs11885069	STAT1	-1.24176	-2.95029	0.466781	0.157207	0.786897	-0.838762	2.41256	0.344728	-0.163771	-1.34361	1.01606	0.785819	191870624	2	G	intronic	2q32.2
rs1861759	NOD2	-0.954006	-2.79483	0.886813	0.312051	1.28505	-0.712203	3.2823	0.20981	0.184416	-1.1517	1.52054	0.787001	50745583	16	G	exonic	16q12.1
rs17159124	NOD1	1.86738	-0.734123	4.46888	0.162496	-0.368199	-2.44945	1.71305	0.729409	0.212761	-1.32924	1.75477	0.787076	30508784	7	G	intronic	7p14.3
rs12693591	STAT1	0.316036	-1.54523	2.1773	0.739936	-0.236199	-2.21774	1.74534	0.815683	0.178034	-1.14826	1.50432	0.792711	191860502	2	A	intronic	2q32.2
rs1558070	NOD1	-1.53754	-5.19074	2.11565	0.411254	0.461046	-1.89268	2.81477	0.701738	-0.255569	-2.16416	1.65302	0.793209	30503486	7	A	intronic	7p14.3
rs375947	IL12RB1	-0.0277533	-1.8274	1.77189	0.975944	-0.221515	-1.85398	1.41095	0.790743	-0.159357	-1.35535	1.03664	0.794211	18180451	19	T	exonic	19p13.11
rs10457655	IFNGR1	-1.48062	-3.23157	0.270322	0.100423	1.10014	-0.594216	2.7945	0.205697	-0.159756	-1.37775	1.05824	0.797352	137539810	6	T	intronic	6q23.3
rs2853694	IL12B	0.891137	-0.897863	2.68014	0.33111	-0.708975	-2.37541	0.957458	0.406067	0.155785	-1.05802	1.36959	0.801612	158749088	5	T	intronic	5q33.3
rs10983756	NOD1	-1.15534	-3.56011	1.24944	0.348512	0.574514	-1.62152	2.77054	0.609091	-0.204552	-1.81834	1.40923	0.804022	120473180	9	T	intronic	9q33.1
rs5743809	TLR6	-0.892266	-3.12611	1.34158	0.435425	0.729382	-1.60149	3.06025	0.54086	-0.20262	-1.80249	1.39725	0.80418	38830514	4	G	exonic	4p14
rs5744280	IL18	0.731687	-1.05082	2.51419	0.422865	-0.524025	-2.24632	1.19827	0.552104	0.152942	-1.08075	1.38664	0.808238	112016514	11	A	intronic	11q23.1
rs6679356	IL12RB2	0.0502144	-1.81888	1.91931	0.958103	-0.345422	-2.12893	1.43809	0.704934	-0.158869	-1.44603	1.12829	0.809062	67820194	1	G	intronic	1p31.3
rs10489627	IL12RB2	-0.381509	-2.15604	1.39302	0.674321	0.25186	-1.39946	1.90318	0.765521	-0.146326	-1.33275	1.0401	0.809203	67779676	1	T	UTR5	1p31.3
rs2227306	CXCL8	0.182222	-1.8043	2.16874	0.857658	0.275894	-1.80136	2.35315	0.795078	0.174197	-1.24967	1.59806	0.81071	74607055	4	G	intronic	4q13.3
rs5744229	IL18	0.644702	-1.46341	2.75281	0.550157	-0.217427	-2.89329	2.45844	0.873741	0.186892	-1.44799	1.82178	0.822913	112034577	11	C	intronic	11q23.1
rs2284553	IFNGR2	0.46686	-2.65862	3.59234	0.770293	0.76418	-2.97503	4.50339	0.689478	0.263241	-2.09593	2.62241	0.827083	34776695	21	T	intronic	NA
rs40184	SLC6A3	-0.749106	-2.79231	1.29409	0.473967	0.262934	-1.53326	2.05913	0.774691	-0.14856	-1.4898	1.19268	0.82833	1395077	5	C	intronic	5p15.33
rs5743892	TOLLIP	0.169091	-3.24968	3.58786	0.922953	0.126053	-1.93287	2.18498	0.904694	0.174845	-1.41519	1.76488	0.829548	1325333	11	C	intronic	11p15.5
rs12138219	IL12RB2	0.941394	-1.37132	3.25411	0.426741	-0.746645	-2.81035	1.31706	0.47967	0.160378	-1.3604	1.68115	0.83643	67781531	1	C	intronic	1p31.3
rs8177368	TIRAP	-1.02643	-4.43634	2.38347	0.556465	1.21727	-2.24516	4.6797	0.492156	0.246874	-2.16916	2.66291	0.841446	126160466	11	T	UTR5	11q24.2
rs2834213	IFNGR2	1.65217	-1.43802	4.74236	0.297061	-0.853862	-4.05266	2.34493	0.601842	0.220081	-1.94668	2.38684	0.842379	34792910	21	T	intronic	21q22.11
rs2069838	IL6	-0.999277	-3.71452	1.71597	0.472326	1.01809	-1.30425	3.34043	0.391978	0.176853	-1.58445	1.93816	0.844159	22768479	7	T	intronic	7p15.3
rs2280233	STAT1	-0.401609	-2.3636	1.56038	0.689079	0.230468	-1.73621	2.19714	0.818741	-0.13681	-1.51739	1.24377	0.846171	191850566	2	C	intronic	2q32.2
rs6693065	IL12RB2	-0.196377	-2.0238	1.63105	0.833581	-0.0267442	-1.7406	1.68711	0.975653	-0.119685	-1.36416	1.12479	0.850654	67800018	1	C	intronic	1p31.3
rs3750920	TOLLIP	0.398741	-1.32142	2.1189	0.650498	0.433784	-1.22271	2.09027	0.608743	0.112771	-1.06464	1.29018	0.851257	1309956	11	G	exonic	11p15.5
rs256996	TICAM2	-0.308365	-2.05361	1.43688	0.729784	0.186776	-1.38384	1.7574	0.81611	0.112056	-1.06402	1.28813	0.852023	114916090	5	C	UTR3	5q22.3
rs5743569	TLR1	-0.79845	-3.15064	1.55374	0.507277	0.361284	-1.63653	2.3591	0.723648	-0.142461	-1.65102	1.36609	0.85332	38805704	4	A	intronic	4p14
rs17473484	TICAM2	-0.714434	-3.41004	1.98117	0.604505	0.423005	-1.72632	2.57233	0.700392	0.150921	-1.50552	1.80736	0.858427	114915460	5	T	UTR3	5q22.3
rs1143641	IL1B	-2.10931	-6.11658	1.89796	0.304758	0.473918	-1.66223	2.61007	0.664488	0.165695	-1.69997	2.03136	0.861969	113588666	2	G	intronic	2q13
rs28363167	SLC6A3	-3.67995	-9.06049	1.70059	0.18289	0.0539816	-3.62855	3.73652	0.977128	-0.247962	-3.04351	2.54759	0.862137	1394615	5	C	UTR3	NA
rs5743266	NOD2	-0.640264	-2.60878	1.32825	0.525178	NA	NA	NA	NA	0.106942	-1.13059	1.34447	0.865652	50731097	16	T	UTR5	16q12.1
rs5030717	NOD1	0.278996	-1.69558	2.25357	0.782363	-0.392484	-2.20509	1.42012	0.672061	0.113459	-1.20511	1.43203	0.86622	120473834	9	T	intronic	9q33.1
rs17852635	IL12RB1	-0.0635278	-2.56801	2.44096	0.960441	-0.476803	-2.39228	1.43868	0.626552	-0.126338	-1.63373	1.38105	0.869663	18186575	19	G	exonic	19p13.11
rs2066992	IL6	-0.471021	-2.75763	1.81559	0.687208	0.0259451	-1.89409	1.94598	0.978916	-0.122096	-1.58518	1.34099	0.87022	22768249	7	C	intronic	7p15.3
rs2559990	TICAM2	-0.34395	-2.45314	1.76524	0.749885	0.607251	-1.4235	2.63801	0.558952	0.120864	-1.3361	1.57783	0.870983	114921251	5	T	intronic	5q22.3
rs1039559	TLR6	1.21244	-1.94061	4.36549	0.452714	-0.87385	-3.19861	1.45091	0.462767	0.149119	-1.6498	1.94803	0.871078	38831596	4	A	intronic	4p14
rs3136558	IL1B	0.141636	-1.86889	2.15216	0.890439	0.161255	-1.83426	2.15677	0.874429	0.107425	-1.29161	1.50646	0.880504	113591275	2	T	intronic	2q13
rs5743561	TLR1	-0.796789	-3.16051	1.56693	0.510239	0.47947	-1.59043	2.54937	0.650667	-0.112763	-1.65091	1.42538	0.885873	38806192	4	G	intronic	4p14
rs3761041	IL12RB1	0.0403285	-1.98156	2.06222	0.968888	-0.392977	-2.1276	1.34164	0.657843	-0.0937516	-1.395	1.2075	0.887826	18183917	19	T	intronic	19p13.11
rs7555183	IL12RB2	0.488405	-1.25928	2.23609	0.585012	-0.923867	-2.65904	0.811306	0.298853	-0.0851608	-1.29574	1.12542	0.890457	67860627	1	A	intronic	1p31.3
rs7744	MYD88	0.26258	-4.27792	4.80308	0.909965	0.585139	-3.85209	5.02237	0.796505	0.219528	-2.92577	3.36483	0.891309	38184021	3	A	UTR3	NA
rs5030719	TLR4	-3.07204	-6.93289	0.78881	0.121819	2.23962	-1.03736	5.5166	0.183012	0.174168	-2.34167	2.69	0.892188	120475936	9	G	exonic	NA
rs2963253	SLC6A3	0.647155	-1.2579	2.55221	0.506986	-0.508286	-2.23583	1.21926	0.565274	0.0839969	-1.18753	1.35553	0.897095	1414773	5	G	intronic	5p15.33
rs1554606	IL6	-1.48689	-3.22289	0.249109	0.0961194	1.28437	-0.342499	2.91124	0.124498	-0.0769632	-1.26688	1.11296	0.899233	22768707	7	C	intronic	7p15.3
rs438421	IL12RB1	-0.605619	-2.35936	1.14813	0.499979	0.907684	-0.754795	2.57016	0.286785	0.0774754	-1.12813	1.28308	0.899879	18176086	19	G	intronic	19p13.11
rs11887698	STAT1	-0.394692	-2.39018	1.6008	0.699043	0.416889	-1.45269	2.28646	0.662886	0.0736183	-1.28547	1.4327	0.915543	191854874	2	T	intronic	2q32.2
rs6500328	NOD2	-0.581799	-2.37257	1.20898	0.525629	0.47484	-1.27762	2.2273	0.596383	0.0643755	-1.17405	1.3028	0.918938	50736656	16	T	intronic	16q12.1
rs2066445	IL12RB2	-0.0970832	-1.96344	1.76928	0.918984	0.0805229	-1.58214	1.74318	0.92454	-0.0642554	-1.30282	1.17431	0.919098	67781975	1	T	intronic	1p31.3
rs1474347	IL6	-1.56329	-4.24202	1.11544	0.255264	1.01597	-1.08196	3.1139	0.344506	0.0813411	-1.56165	1.72433	0.922784	22768124	7	A	intronic	7p15.3
rs1368439	IL12B	NA	NA	NA	NA	0.550493	-4.89041	5.9914	0.843153	0.20808	-4.17656	4.59272	0.925973	158742014	5	T	UTR3	NA
rs436857	IL12RB1	0.715851	-1.41908	2.85078	0.51248	-0.397949	-2.1901	1.3942	0.664212	0.0629254	-1.29343	1.41928	0.927628	18197635	19	G	exonic	19p13.11
rs583911	IL12A	0.287753	-1.67339	2.2489	0.774237	-0.163341	-2.01233	1.68565	0.862837	-0.0606874	-1.37592	1.25455	0.92802	159710390	3	A	ncRNA_intronic	3q25.33
rs5743942	TOLLIP	0.152419	-1.57246	1.8773	0.862822	-0.0281893	-1.93314	1.87676	0.976911	-0.0513478	-1.26557	1.16287	0.934015	1314028	11	G	intronic	11p15.5
rs1927907	NOD1	0.349351	-1.48941	2.18811	0.710342	-0.431204	-2.10977	1.24736	0.615566	0.0510725	-1.17696	1.2791	0.935105	120472764	9	C	intronic	9q33.1
rs5744266	IL18	0.476396	-2.5172	3.46999	0.755715	-0.163827	-3.76962	3.44197	0.929195	-0.0892293	-2.36688	2.18843	0.938862	112018525	11	C	intronic	NA
rs352139	TLR9	0.389772	-1.41584	2.19539	0.673081	-0.369455	-2.03786	1.29895	0.665075	-0.0476438	-1.27175	1.17647	0.939259	52258372	3	A	intronic	3p21.2
rs464061	SLC6A3	-1.11621	-3.02389	0.791481	0.253992	0.562284	-1.24496	2.36952	0.543179	-0.0494093	-1.35192	1.2531	0.940796	1430244	5	C	intronic	5p15.33
rs456082	SLC6A3	-1.11621	-3.02389	0.791481	0.253992	0.562284	-1.24496	2.36952	0.543179	-0.0494093	-1.35192	1.2531	0.940796	1430515	5	A	intronic	5p15.33
rs2069835	IL6	-0.750364	-3.10531	1.60458	0.533653	0.733793	-1.42784	2.89543	0.50715	-0.0581057	-1.62421	1.50799	0.942093	22767871	7	T	intronic	7p15.3
rs2069845	IL6	-1.42443	-3.16938	0.320527	0.112581	1.28437	-0.342499	2.91124	0.124498	-0.0430059	-1.23473	1.14872	0.943674	22770149	7	G	intronic	7p15.3
rs2546893	IL12B	0.925088	-0.88739	2.73757	0.319382	-0.867797	-2.68054	0.944946	0.350044	0.0447355	-1.22562	1.31509	0.945033	158755960	5	C	intronic	5q33.3
rs2243248	IL4	0.619858	-1.21147	2.45118	0.508508	-0.873583	-2.52844	0.78128	0.302979	-0.0427182	-1.26252	1.17708	0.945336	132008644	5	G	intergenic	5q31.1
rs4785224	NOD2	-0.831321	-2.54901	0.886367	0.344985	0.722401	-0.904952	2.34975	0.386061	0.040099	-1.13925	1.21945	0.946926	50730446	16	A	upstream	16q12.1
rs2069844	IL6	-1.0507	-2.85329	0.751894	0.255866	0.880716	-0.772506	2.53394	0.298589	-0.0403062	-1.25662	1.17601	0.948271	22770010	7	A	intronic	7p15.3
rs2280234	STAT1	-0.728196	-2.49773	1.04133	0.421716	0.733383	-0.922854	2.38962	0.387247	0.0355824	-1.17083	1.24199	0.953951	191850099	2	C	intronic	2q32.2
rs1042098	SLC6A3	-0.45594	-2.28847	1.37659	0.626801	-0.267276	-2.31052	1.77597	0.798107	-0.0348864	-1.34029	1.27051	0.958272	1394815	5	G	UTR3	5p15.33
rs698365	TICAM2	0.402296	-1.4141	2.21869	0.665081	-0.344774	-2.09468	1.40514	0.70008	0.0297476	-1.22864	1.28814	0.963085	114951080	5	T	ncRNA_intronic	5q22.3
rs400570	TICAM2	0.402296	-1.4141	2.21869	0.665081	-0.344774	-2.09468	1.40514	0.70008	0.0297476	-1.22864	1.28814	0.963085	114951553	5	G	ncRNA_intronic	5q22.3
rs11466716	TICAM1	-0.496434	-2.52785	1.53498	0.632919	0.257299	-1.71472	2.22932	0.798612	-0.0280611	-1.42941	1.37329	0.968727	4818655	19	G	intronic	19p13.3
rs5743998	TOLLIP	-1.49842	-5.13125	2.1344	0.420684	0.807661	-2.2104	3.82573	0.600922	0.0348058	-2.27634	2.34595	0.976478	1302277	11	G	intronic	11p15.5
rs9326969	TICAM2	-1.27101	-4.05095	1.50893	0.372198	0.0881849	-2.78325	2.95962	0.952105	0.0236408	-1.90649	1.95377	0.980868	114957561	5	C	intronic	5q22.3
rs3024496	IL10	-0.96895	-2.79177	0.853873	0.299821	0.7008	-0.983566	2.38517	0.416468	0.0146119	-1.21194	1.24117	0.981392	206941864	1	A	UTR3	1q32.1
rs256943	TICAM2	0.417743	-1.3745	2.20998	0.648726	-0.543121	-2.20479	1.11855	0.523026	0.0115363	-1.18851	1.21158	0.984984	114928381	5	G	intronic	5q22.3
rs424434	TICAM2	0.585482	-1.17467	2.34563	0.515826	-0.753139	-2.35357	0.847296	0.358263	-0.0100476	-1.20168	1.18159	0.986829	114947180	5	A	ncRNA_intronic	5q22.3
rs5743599	TLR1	0.283865	-1.60467	2.1724	0.768882	-0.301131	-2.18815	1.58589	0.755012	-0.00743823	-1.33269	1.31781	0.991232	38802164	4	T	intronic	4p14
rs5743567	TLR1	-0.339287	-2.09976	1.42119	0.706379	0.209693	-1.49045	1.90984	0.809406	-0.00472998	-1.21947	1.21001	0.993917	38805840	4	T	intronic	4p14
rs2069849	IL6	-0.623079	-2.66851	1.42235	0.551743	0.682447	-1.16717	2.53207	0.471029	-0.00468053	-1.371	1.36164	0.994649	22771156	7	C	exonic	7p15.3
rs16833143	STAT1	-0.534523	-2.66237	1.59332	0.623493	0.278082	-1.82486	2.38103	0.795956	0.0047421	-1.47354	1.48302	0.994989	191846335	2	T	intronic	2q32.2
rs2907749	NOD1	-0.493245	-2.41841	1.43193	0.616591	0.454238	-1.36929	2.27777	0.626307	-0.00313225	-1.3168	1.31053	0.996275	30485741	7	T	intronic	7p14.3
rs1800797	IL6	NA	NA	NA	NA	NA	NA	NA	NA	NA	NA	NA	NA	22766221	7	G	ncRNA_exonic	NA
rs2069832	IL6	NA	NA	NA	NA	NA	NA	NA	NA	NA	NA	NA	NA	22767433	7	G	intronic	NA
rs10079000	TICAM2	NA	NA	NA	NA	NA	NA	NA	NA	NA	NA	NA	NA	114940200	5	C	ncRNA_intronic	5q22.3

## Sheet: Sheet1
rs10208033	191879417	2	C	intronic			rs1046673	TICAM1	0.0463884	-1.79672	1.8895	0.960753	-0.515149	-2.18255	1.15225	0.545997	-0.297531	-1.51224	0.917178	0.63164	NA	NA	NA	NA	NA
rs11536866	120466218	9	A	upstream			rs11209052	IL12RB2	0.266067	-1.96227	2.49441	0.815415	1.16554	-1.05281	3.38388	0.305246	0.477409	-1.09166	2.04648	0.551533	NA	NA	NA	NA	NA
rs11564772	1398007	5	C	intronic			rs11305	STAT1	1.53535	-0.313828	3.38454	0.106601	1.73672	-0.119447	3.59288	0.0692365	1.64107	0.331936	2.95021	0.0147581	NA	NA	NA	NA	NA
rs1368439	158742014	5	T	UTR3			rs1143634	IL1B	0.124052	-1.88953	2.13763	0.904115	-1.03544	-3.10058	1.0297	0.32779	-0.584924	-2.0074	0.837556	0.42111	NA	NA	NA	NA	NA
rs1433048	158755845	5	A	intronic			rs11536866	TLR4	-3.13265	-6.40863	0.143321	0.0636234	1.52617	-1.51039	4.56274	0.326629	-0.520595	-2.75843	1.71724	0.648852	NA	NA	NA	NA	NA
rs1495964	67794818	1	G	intronic			rs11693463	STAT1	-1.86396	-3.64151	-0.0863995	0.0424084	1.22306	-0.437265	2.88339	0.151487	-0.199754	-1.42503	1.02552	0.74962	NA	NA	NA	NA	NA
rs16833155	191861377	2	C	intronic			rs16833143	STAT1	-0.534523	-2.66237	1.59332	0.623493	0.278082	-1.82486	2.38103	0.795956	0.0047421	-1.47354	1.48302	0.994989	NA	NA	NA	NA	NA
rs17129782	67787975	1	G	intronic			rs1914408	STAT1	-0.393294	-2.16016	1.37357	0.663509	-1.13782	-2.72915	0.453513	0.163758	-0.822543	-2.00333	0.358247	0.173491	NA	NA	NA	NA	NA
rs17770244	30515812	7	A	intronic			rs2043055	IL18	0.279119	-1.80264	2.36088	0.793225	1.0986	-1.03015	3.22734	0.313878	0.720552	-0.76032	2.20142	0.341263	NA	NA	NA	NA	NA
rs17883885	34807557	21	C	intronic			rs2070874	IL4	-0.887647	-2.90325	1.12795	0.389979	-2.12552	-4.19603	-0.0550009	0.0465302	-1.18453	-2.62553	0.256471	0.108529	NA	NA	NA	NA	NA
rs1800797	22766221	7	G	ncRNA_exonic			rs2256023	NOD1	0.732313	-1.16915	2.63378	0.452025	0.764993	-0.936321	2.46631	0.379972	0.765677	-0.498382	2.02974	0.236384	NA	NA	NA	NA	NA
rs2069709	68553703	12	C	intronic			rs2569254	IL12B	1.66458	-0.95947	4.28863	0.216461	1.20127	-2.2415	4.64403	0.495407	1.36372	-0.696526	3.42397	0.195817	NA	NA	NA	NA	NA
rs2069719	68549786	12	T	intronic			rs3024490	IL10	-1.31686	-3.15358	0.51985	0.162869	-1.25849	-2.98007	0.463086	0.15461	-1.36194	-2.60824	-0.115629	0.033271	NA	NA	NA	NA	NA
rs2069832	22767433	7	G	intronic			rs3024491	IL10	-0.104496	-1.85601	1.64702	0.907131	2.00587	0.385953	3.62579	0.0167637	1.08976	-0.0986422	2.27816	0.0736094	NA	NA	NA	NA	NA
rs2243132	159712230	3	C	intronic			rs3024498	IL10	-0.362204	-2.67888	1.95447	0.759865	0.747639	-1.30554	2.80082	0.47684	0.327139	-1.17694	1.83122	0.67029	NA	NA	NA	NA	NA
rs2284553	34776695	21	T	intronic			rs3136558	IL1B	0.141636	-1.86889	2.15216	0.890439	0.161255	-1.83426	2.15677	0.874429	0.107425	-1.29161	1.50646	0.880504	NA	NA	NA	NA	NA
rs2546892	158755475	5	G	intronic			rs352140	TLR9	-0.0684265	-1.78878	1.65193	0.938006	-1.16432	-2.88733	0.558701	0.187955	-0.533009	-1.73489	0.668869	0.385636	NA	NA	NA	NA	NA
rs28363167	1394615	5	C	UTR3			rs4235232	TLR2	0.712749	-1.17972	2.60522	0.46202	0.222761	-1.72778	2.1733	0.823275	0.191548	-1.15382	1.53692	0.780454	NA	NA	NA	NA	NA
rs2970501	30495993	7	C	intronic			rs424434	TICAM2	0.585482	-1.17467	2.34563	0.515826	-0.753139	-2.35357	0.847296	0.358263	-0.0100476	-1.20168	1.18159	0.986829	NA	NA	NA	NA	NA
rs3181221	158747158	5	A	intronic			rs429774	IL12RB1	-0.165861	-2.01658	1.68486	0.860901	-0.72383	-2.38219	0.934533	0.394046	-0.411781	-1.64122	0.817656	0.512185	NA	NA	NA	NA	NA
rs5030719	120475936	9	G	exonic			rs438421	IL12RB1	-0.605619	-2.35936	1.14813	0.499979	0.907684	-0.754795	2.57016	0.286785	0.0774754	-1.12813	1.28308	0.899879	NA	NA	NA	NA	NA
rs5743270	50742062	16	G	intronic			rs4720004	NOD1	-1.53754	-5.19074	2.11565	0.411254	0.610877	-1.81027	3.03202	0.62187	-0.278277	-2.21257	1.65602	0.778219	NA	NA	NA	NA	NA
rs5743285	50750791	16	G	intronic			rs5030719	TLR4	-3.07204	-6.93289	0.78881	0.121819	2.23962	-1.03736	5.5166	0.183012	0.174168	-2.34167	2.69	0.892188	NA	NA	NA	NA	NA
rs5743621	38798255	4	G	exonic			rs5743336	NOD1	0.627821	-1.2146	2.47024	0.50567	0.121043	-1.51825	1.76033	0.88518	0.35934	-0.856562	1.57524	0.563	NA	NA	NA	NA	NA
rs5743818	38829163	4	A	exonic			rs5743808	TLR6	0.0805595	-1.97694	2.13806	0.938972	-0.450403	-2.1196	1.21879	0.597905	-0.290375	-1.55282	0.97207	0.652548	NA	NA	NA	NA	NA
rs5744034	1296237	11	A	UTR3			rs6350	SLC6A3	-0.183719	-3.4869	3.11946	0.913396	-0.424318	-2.79579	1.94716	0.726454	-0.340875	-2.25434	1.57259	0.727288	NA	NA	NA	NA	NA
rs5744266	112018525	11	C	intronic			rs6693065	IL12RB2	-0.196377	-2.0238	1.63105	0.833581	-0.0267442	-1.7406	1.68711	0.975653	-0.119685	-1.36416	1.12479	0.850654	NA	NA	NA	NA	NA
rs6873889	114930364	5	T	intronic			rs6894567	IL12B	-1.16277	-2.86039	0.534848	0.182306	-0.0952267	-1.78463	1.59417	0.91222	-0.70227	-1.88311	0.478573	0.244979	NA	NA	NA	NA	NA
rs7255265	4818378	19	C	exonic			rs7255265	TICAM1	-3.18362	-8.12782	1.76058	0.209722	-5.6999	-10.676	-0.723818	0.026657	-3.95612	-7.43051	-0.48172	0.0266128	NA	NA	NA	NA	NA
rs7744	38184021	3	A	UTR3			rs7548737	IL12RB2	0.647746	-1.22809	2.52358	0.500001	0.00790056	-1.92233	1.93814	0.993613	0.33144	-1.00193	1.66481	0.626586	NA	NA	NA	NA	NA
rs7938943	112016661	11	G	intronic			rs7562024	STAT1	0.468739	-1.75165	2.68912	0.680308	-0.77692	-2.59965	1.04581	0.405192	-0.210567	-1.60748	1.18634	0.767974	NA	NA	NA	NA	NA
rs8177360	126156867	11	G	intronic			rs8177365	TIRAP	-1.39392	-3.49468	0.70684	0.196216	0.198751	-1.60166	1.99917	0.829081	-0.366181	-1.74418	1.01182	0.602985	NA	NA	NA	NA	NA
